# Supplementary material for: Differences in Survivability under Starvation Conditions Among Four Species of Purple Nonsulfur Phototrophic Bacteria
Source: PubMed Central journal article supplement (PMC4159045; doi:10.1264/jsme2.me14013), 2014-06-18
Supplement: 29_326_s1.pdf [file 29_326_s1.pdf]

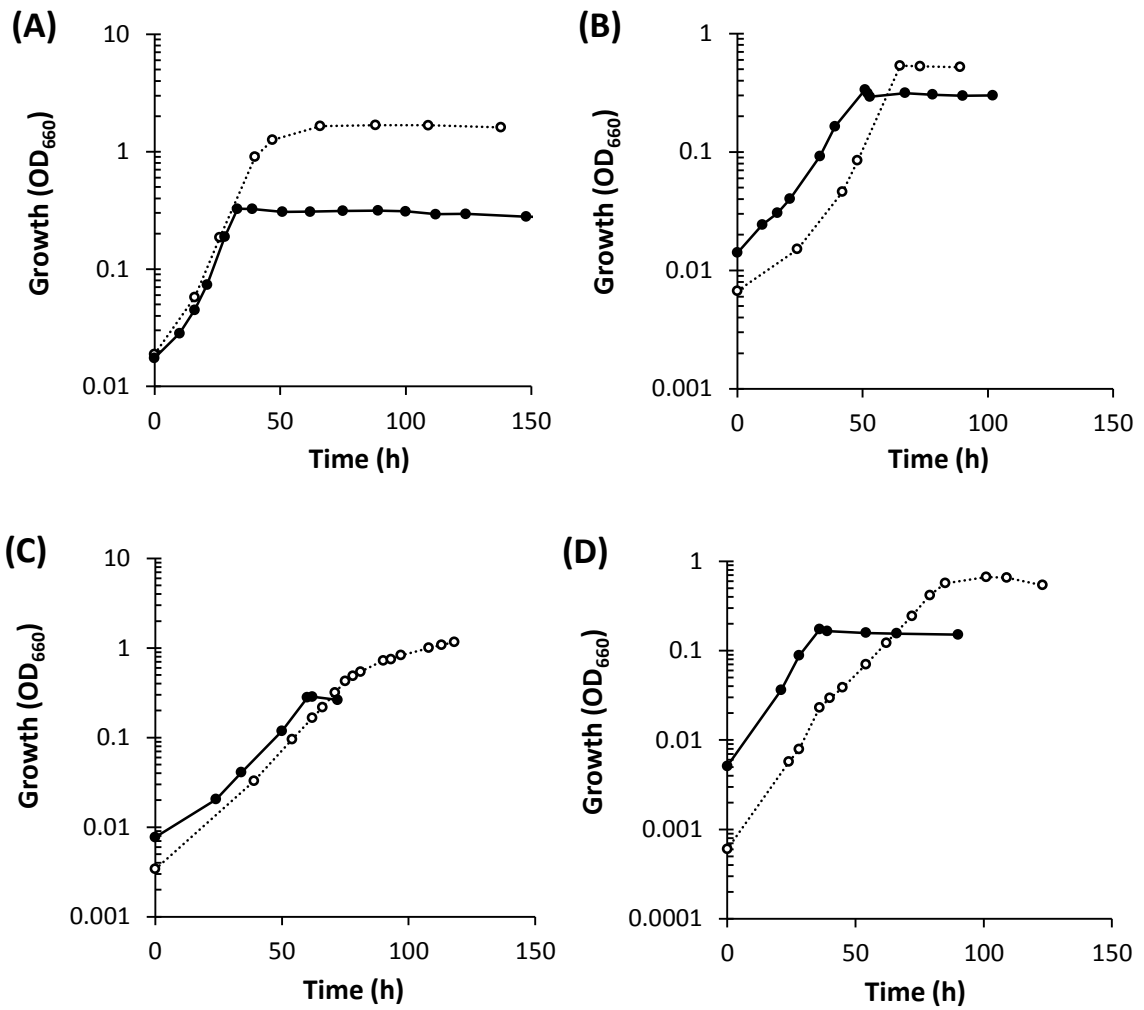

**Fig. S1.** Growth of the purple nonsulfur phototrophic bacteria in the carbon-limited medium containing 0.5 g sodium succinate per liter (filled circle) or in the carbon-sufficient medium containing 5 g sodium succinate per liter (open circle). The cells of *Rps. palustris* ATCC BAA-98 (A), *Rsp. rubrum* S1<sup>T</sup> (B), *Rba. sphaeroides* ATCC 17023<sup>T</sup> (C) and *Rvi. gelatinosus* IL144 (D) were grown under anaerobic light conditions.

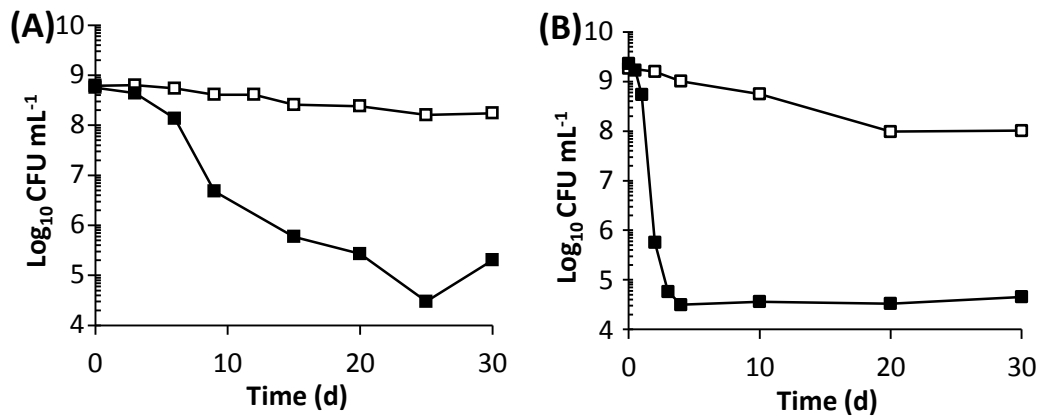

**Fig. S2.** Change in viability during carbon-starvation conditions. Starved cells of *Rba. sphaeroides* ATCC 17023<sup>T</sup> (A) and *Rvi. gelatinosus* IL144 (B) were incubated in the light (open square) and dark (filled square). Time 0 was defined as the time when the growth completely stopped. Viability was measured as described in Fig. 1.
